# Supplementary material for: Repurposing of Sitagliptin- Melittin Optimized Nanoformula against SARS-CoV-2; Antiviral Screening and Molecular Docking Studies
Source: PubMed Central journal article supplement (PMC8025909; doi:10.3390/pharmaceutics13030307), 2021-02-26
Supplement: pharmaceutics-13-00307-s001.pdf [file pharmaceutics-13-00307-s001.pdf]

# Supplementary Materials: Repurposing of Sitagliptin- Melittin Optimized Nanoformula against SARS-CoV-2; Antiviral Screening and Molecular Docking Studies

Mohammed W. Al-Rabia, Nabil A. Alhakamy, Osama A. A. Ahmed, Khalid Eljaaly, Ahmed L. Aloafi, Ahmed Mostafa, Hani Z. Asfour, Ahmed A. Aldarmahi, Khaled M. Darwish, Tarek S. Ibrahim and Usama A. Fahmy

Table S1. Design details.

| Std | Run | Factor 1 | Factor 2 | Factor 3 | Response 1 | Response 2 |
|-----|-----|----------|----------|----------|------------|------------|
|     |     | A:SIT    | B:MEL    | C:pH     | Size       | ZP         |
|     |     | M        | M        |          | nm         |            |
| 4   | 1   | 10       | 10       | 6        | 432.11     | 9.45       |
| 6   | 2   | 10       | 1        | 10       | 231.43     | 31.21      |
| 8   | 3   | 10       | 10       | 10       | 387.19     | 28.35      |
| 2   | 4   | 10       | 1        | 6        | 213.25     | 6.27       |
| 1   | 5   | 1        | 1        | 6        | 121.31     | 7.19       |
| 7   | 6   | 1        | 10       | 10       | 323.16     | 32.25      |
| 3   | 7   | 1        | 10       | 6        | 345.29     | 18.39      |
| 5   | 8   | 1        | 1        | 10       | 123.41     | 26.42      |

Abbreviations: SIT :Sitagliptin, MEL: Melittin, ZP: Zeta potential.

**Citation:** Al-Rabia, M.W.; Alhakamy, N.A.; Ahmed, O.A.A.; Eljaaly, K.; Mostafa, A.; Asfour, H.Z.; Aldarmahi, A.A.; Darwish, K.M.; Ibrahim, T.S.; Fahmy, U.A. Repurposing of Sitagliptin- Melittin Optimized Nanoformula against SARS-CoV-2; Antiviral Screening and Molecular Docking Studies. *Pharmaceutics* **2021**, *13*, 307. <https://doi.org/10.3390/pharmaceutics13030307>

**Publisher's Note:** MDPI stays neutral with regard to jurisdictional claims in published maps and institutional affiliations.

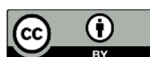

**Copyright:** © 2021 by the authors. Submitted for possible open access publication under the terms and conditions of the Creative Commons Attribution (CC BY) license (<http://creativecommons.org/licenses/by/4.0/>).

**Table S2.** Design Build Information.

| File Version  | 11.1.2.0          |                 |            |
|---------------|-------------------|-----------------|------------|
| Study Type    | Factorial         | Subtype         | Randomized |
| Design Type   | 2 Level Factorial | Runs            | 8          |
| Design Model  | 3FI               | Blocks          | No Blocks  |
| Center Points | 0                 | Build Time (ms) | 1.0000     |

**Table S3.** Design Factors.

| Factor | Name | Units | Type    | Minimum | Maximum | Coded Low | Coded High | Mean | Standard Deviation |
|--------|------|-------|---------|---------|---------|-----------|------------|------|--------------------|
| A      | SIT  | M     | Numeric | 1.0000  | 10.00   | -1 ↔ 1.00 | +1 ↔ 10.00 | 5.50 | 4.81               |
| B      | MEL  | M     | Numeric | 1.0000  | 10.00   | -1 ↔ 1.00 | +1 ↔ 10.00 | 5.50 | 4.81               |
| C      | pH   |       | Numeric | 6.00    | 10.00   | -1 ↔ 6.00 | +1 ↔ 10.00 | 8.00 | 2.14               |

**Table S4.** Design responses.

| Response | Name | Units | Observations | Analysis  | Minimum | Maximum | Mean   | Standard deviation. | Ratio | Transform | Model        |
|----------|------|-------|--------------|-----------|---------|---------|--------|---------------------|-------|-----------|--------------|
| R1       | Size | nm    | 8            | Factorial | 121.31  | 432.11  | 272.14 | 117.58              | 3.56  | None      | Main Effects |
| R2       | ZP   |       | 8            | Factorial | 6.27    | 32.25   | 19.94  | 11.04               | 5.14  | None      | 2FI          |

**Table 5.** Size Analysis data (ANOVA).

| Source    | Sum of Squares | df | Mean Square | F-Value | p-Value | Significance |
|-----------|----------------|----|-------------|---------|---------|--------------|
| Model     | 95,327.23      | 3  | 31,775.74   | 87.70   | 0.0004  | significant  |
| A-SIT     | 15,383.46      | 1  | 15,383.46   | 42.46   | 0.0029  |              |
| B-MEL     | 79,670.34      | 1  | 79,670.34   | 219.89  | 0.0001  |              |
| C-pH      | 273.43         | 1  | 273.43      | 0.7547  | 0.4340  |              |
| Residual  | 1449.28        | 4  | 362.32      |         |         |              |
| Cor Total | 96,776.50      | 7  |             |         |         |              |

**Fit statistics**

|                            |         |
|----------------------------|---------|
| Standard deviation         | 19.03   |
| Mean                       | 272.14  |
| Coefficient of variation % | 6.99    |
| R <sup>2</sup>             | 0.9850  |
| Adjusted R <sup>2</sup>    | 0.9738  |
| Predicted R <sup>2</sup>   | 0.9401  |
| Adeq Precision             | 22.2134 |

**Table 6.** ZP analysis (ANOVA).

| Source    | Sum of Squares | df | Mean Square | F-Value   | p-Value | Significance |
|-----------|----------------|----|-------------|-----------|---------|--------------|
| Model     | 853.09         | 6  | 142.18      | 2533.85   | 0.0152  | significant  |
| A-SIT     | 10.06          | 1  | 10.06       | 179.24    | 0.0475  |              |
| B-MEL     | 37.63          | 1  | 37.63       | 670.58    | 0.0246  |              |
| C-pH      | 739.78         | 1  | 739.78      | 13,183.84 | 0.0055  |              |
| AB        | 34.90          | 1  | 34.90       | 622.02    | 0.0255  |              |
| AC        | 14.45          | 1  | 14.45       | 257.43    | 0.0396  |              |
| BC        | 16.27          | 1  | 16.27       | 290.02    | 0.0373  |              |
| Residual  | 0.0561         | 1  | 0.0561      |           |         |              |
| Cor Total | 853.14         | 7  |             |           |         |              |

  

| Fit statistics            |        |
|---------------------------|--------|
| Standard deviation        | 0.2369 |
| Mean                      | 19.94  |
| Coefficient of variation% | 1.19   |
| R <sup>2</sup>            | 0.9999 |
| Adjusted R <sup>2</sup>   | 0.9995 |
| R <sup>2</sup>            | 0.9999 |
| Adjusted R <sup>2</sup>   | 0.9995 |

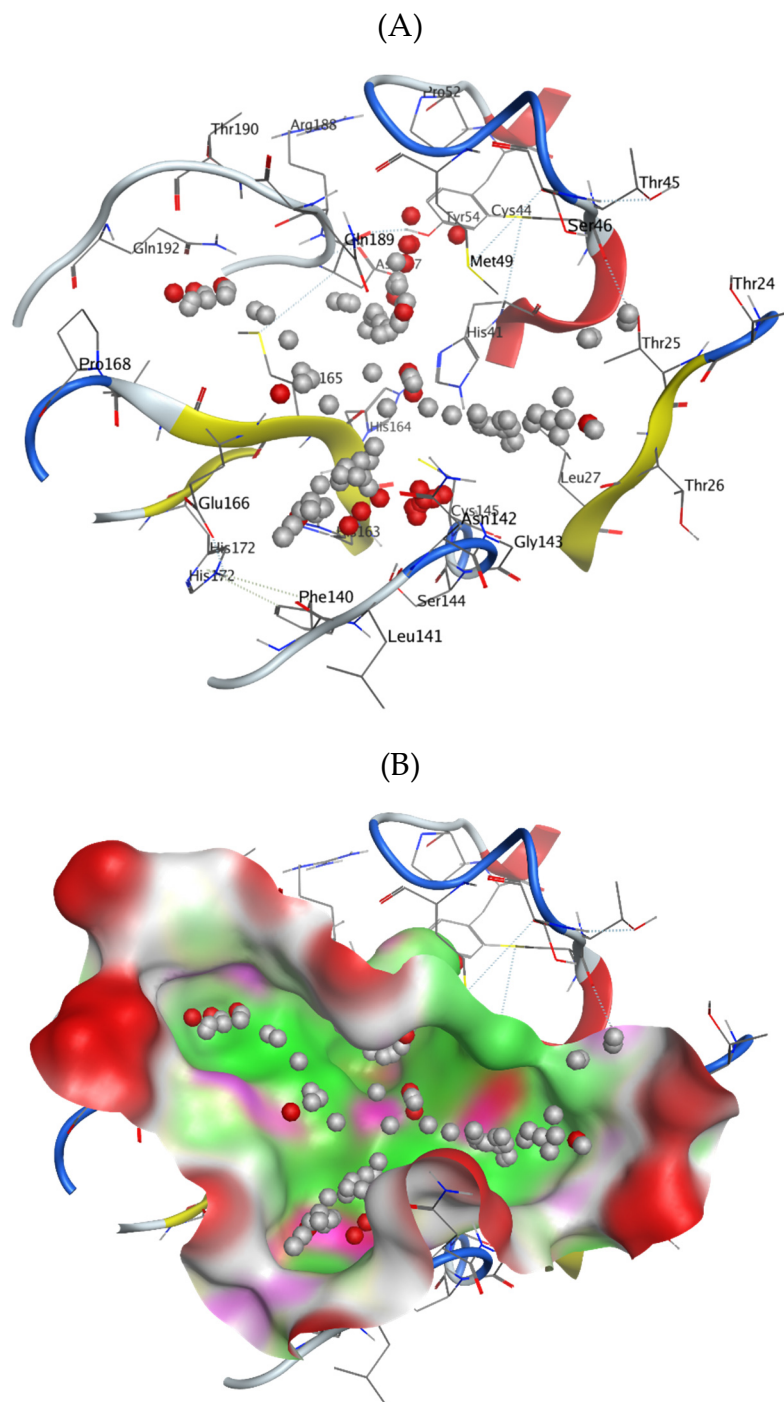

**Figure S1.** The 3D representation of the defined SARS-CoV-2 3CLpro pocket applied within the molecular docking study. (A) the docked pocket with clear representation of the contact residues (gray lines; labeled with sequence numbers), the protein's local backbone and secondary structure (gray/blue = loops; red =  $\alpha$ -helix; yellow =  $\beta$ -sheets), along with the 109 alpha spheres indicates the type of atom (red = hydrophilic; white = hydrophobic) preferred by the atoms of the binding site; (B) molecular surface representation of the defined pocket being colored based on its hydrophobic nature of lining surfaces as well as exposure to solvent (magenta = polar; green = hydrophobic; red = solvent exposed).

### Supplementary Material S1. CC<sub>50</sub> and IC<sub>50</sub> calculation using Crystal violet assay in details

The assay was performed according to the procedure that was previously described [1] with minor modifications. Vero E6 cells were seeded into 96-well plates in 100 µL of DMEM Complete Medium containing DMEM high glucose medium with 2 mM L-glutamine, 1 mM sodium pyruvate, and 10% fetal bovine serum (FBS), 100 units/mL penicillin and 100 µg/mL streptomycin. After 24 h (90–100% confluence monolayer of Vero E6), each compound was diluted using infection DMEM into varying concentrations in a separate U shape 96 well plate (with a range of concentration from 10 µg/mL to 1 ng/mL). An aliquot of 100 µL of each dilution was transferred into new U shape 96 well plate and supplemented with 100 TCID<sub>50</sub> in 100 µL infection media. In parallel the wells dedicated for CC<sub>50</sub> calculation were supplemented with 100 µL infection media without virus. Aliquots of 100 µL infection media containing 100 TCID<sub>50</sub> were used as virus control. After 1 h of incubation, 100 µL of each well were transferred to their corresponding wells into the 96-well plates containing Vero E6 cultures (Figure X). The plates were incubated for 72 h, the cell monolayers were washed with PBS and subjected to cell fixation using 100 µL of 10% formaldehyde for 1 h. Subsequently, the plates are washed well for 3 times with 1x PBS and dried well before staining with 50 µL (0.5%) crystal violet to each well ((0.5 g crystal violet powder (Sigma-Aldrich), 80 mL distilled H<sub>2</sub>O and 20 mL methanol)) for 30 min. the plates were then washed well with rinsed water and air-dried at room temperature for 2–24 h. To destain crystal violet, 200 µL methanol were added to each well, and the plate was incubated with its lid on a bench rocker (20 oscillations/ minute) for 20 minutes at room temperature. Finally, the optical density of each well at 590 nm (OD<sub>590</sub>) was measured with a plate reader. 100% percent was assigned to non-treated control cells, the average OD of each dilution without or with virus was compared to control cells and control virus wells to calculate % toxicity and % reduction in virus replication (respectively). The CC<sub>50</sub> and IC<sub>50</sub> values were calculated using nonlinear regression (three parameters) in GraphPad Prism 5.01.

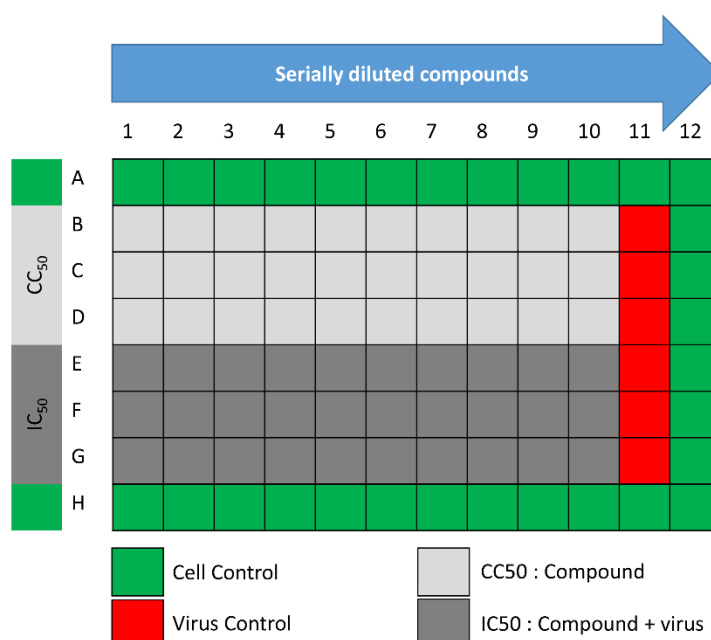

Figure 2. Illustration of plate well distribution.

### Supplementary Material S2. Determination of in vitro cytotoxicity

The cytotoxic concentrations of SIT, MEL and combination of SIT-MEL in Vero-E6 cells was investigated and the result revealed that the CC<sub>50</sub> values were 3062 and 2236 and 552.4 µg/ml, respectively (Figure S3).

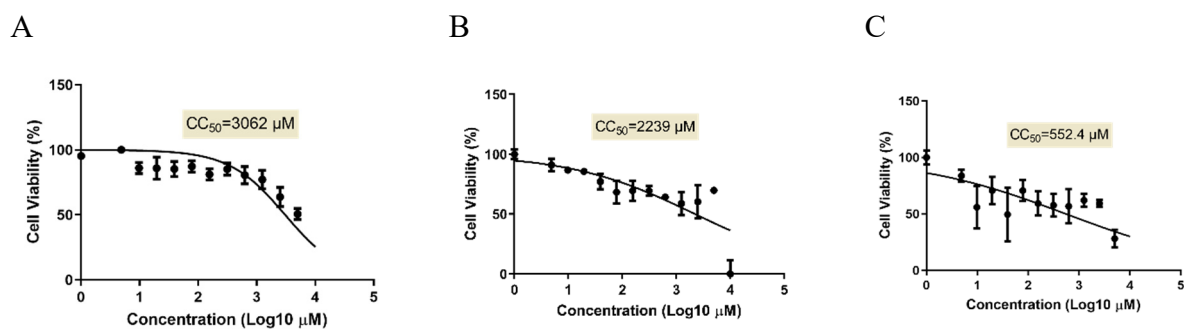

**Figure S3.** % cell viability of the investigated SIT (A), MEL (B) and combination of SIT-MEL (C) at different concentrations in Vero-E6 cells and expressed as % cell viability against log<sub>10</sub> concentrations.

### Reference

1. Feoktistova, M.; Geserick, P.; Leverkus, M. Crystal violet assay for determining viability of cultured cells. *Cold Spring Harb. Protoc.* **2016**, *2016*, 343–346.
